# Supplementary material
Source: ML conference proceedings conference paper supplement (https://proceedings.neurips.cc/paper_files/paper/2017/hash/fca0789e7891cbc0583298a238316122-Abstract.html)
Supplement: Supplementary file [file fca0789e7891cbc0583298a238316122-Supplemental.zip]

# Supplementary material

## A Missing propositions

**Proposition A.1.** Let  $\mathcal{E}$  be a matrix formed by  $[\epsilon_1, \epsilon_2, \dots, \epsilon_k]$ , where  $\epsilon_i$  has mean  $\|\nu_i\| \leq \nu$  and variance  $\Sigma_i \preceq \sigma I$ . By triangle inequality then Jensen's inequality, we have

$$\mathbb{E}[\|\mathcal{E}\|_2] \leq \sum_{i=0}^k \mathbb{E}[\|\epsilon_i\|] \leq \sum_{i=0}^k \sqrt{\mathbb{E}[\|\epsilon_i\|^2]} \leq O(\nu + \sigma). \quad (30)$$

**Proposition A.2.** Consider the function

$$f(x) = \frac{1}{\kappa} \sqrt{a - \lambda x^2} + bx$$

defined for  $x \in [0, \sqrt{a/\lambda}]$ . The its maximal value is attained at

$$x_{opt} = \frac{b\sqrt{a}}{\sqrt{\frac{\lambda^2}{\kappa^2} + \lambda b^2}},$$

and its maximal value is thus, if  $x_{opt} \in [0, \sqrt{a/\lambda}]$ ,

$$f_{\max} = \sqrt{a} \sqrt{\frac{1}{\kappa^2} + \frac{b^2}{\lambda}}. \quad (31)$$

*Proof.* The (positive) root of the derivative of  $f$  follows

$$b\sqrt{a - \lambda x^2} - \frac{1}{\kappa} \lambda x = 0 \quad \Leftrightarrow \quad x = \frac{b\sqrt{a}}{\sqrt{\frac{\lambda^2}{\kappa^2} + \lambda b^2}}.$$

If we inject the solution in our function, we obtain its maximal value,

$$\begin{aligned} \frac{1}{\kappa} \sqrt{a - \lambda \left( \frac{b\sqrt{a}}{\sqrt{\frac{\lambda^2}{\kappa^2} + \lambda b^2}} \right)^2} + b \frac{b\sqrt{a}}{\sqrt{\frac{\lambda^2}{\kappa^2} + \lambda b^2}} &= \frac{1}{\kappa} \sqrt{a - \lambda \frac{b^2 a}{\frac{\lambda^2}{\kappa^2} + \lambda b^2}} + b \frac{b\sqrt{a}}{\sqrt{\frac{\lambda^2}{\kappa^2} + \lambda b^2}}, \\ &= \frac{1}{\kappa} \sqrt{a - \lambda \frac{b^2 a}{\frac{\lambda^2}{\kappa^2} + \lambda b^2}} + b \frac{b\sqrt{a}}{\sqrt{\frac{\lambda^2}{\kappa^2} + \lambda b^2}}, \\ &= \frac{1}{\kappa} \sqrt{\frac{a\lambda^2 \frac{1}{\kappa^2}}{\frac{\lambda^2}{\kappa^2} + \lambda b^2}} + b \frac{b\sqrt{a}}{\sqrt{\frac{\lambda^2}{\kappa^2} + \lambda b^2}}, \\ &= \sqrt{a} \frac{\frac{1}{\kappa^2} \lambda + b^2}{\sqrt{\frac{\lambda^2}{\kappa^2} + \lambda b^2}}, \\ &= \frac{\sqrt{a}}{\lambda} \sqrt{\frac{\lambda^2}{\kappa^2} + \lambda b^2}. \end{aligned}$$

The simplification with  $\lambda$  in the last equality concludes the proof. ■

## B Missing proofs

### B.1 Proof of Proposition 3.6.

Let  $\lambda = \|x_0 - x^*\|^s$ . In this case, (20) becomes

$$\frac{\left\| \sum_{i=0}^k \tilde{c}_i^\lambda \tilde{x}_i \right\|}{\|x_0 - x^*\|} \leq S_\kappa(k, \|x_0 - x^*\|^{s-2}) \sqrt{\frac{1}{\kappa^2} + \frac{O(1)\|P\|^2}{\|x_0 - x^*\|^{3s-2}}} + \frac{\|\mathcal{E}\|}{\|x_0 - x^*\| \sqrt{k+1}} \sqrt{1 + \frac{\|\tilde{R}\|^2}{\|x_0 - x^*\|^s}}.$$

By assumption,  $\|\tilde{R}\| = O(\|x_0 - x^*\|)$ ,  $\|\mathcal{E}\| = O(\|x_0 - x^*\|^2)$  and  $O(\|P\|) = O(\|x_0 - x^*\|^3)$ . The previous bound becomes

$$\frac{\left\|\sum_{i=0}^k \tilde{c}_i^\lambda \tilde{x}_i\right\|}{\|x_0 - x^*\|} \leq S_\kappa(k, \|x_0 - x^*\|^{s-2}) \sqrt{\frac{1}{\kappa^2} + O(\|x_0 - x^*\|^{8-3s})} + O\left(\sqrt{\|x_0 - x^*\|^2 + \|x_0 - x^*\|^{4-s}}\right).$$

Because  $\lambda \in ]2, \frac{8}{3}[$ , all exponents of  $\|x_0 - x^*\|$  are positive. By consequence,

$$\lim_{\|x_0 - x^*\| \rightarrow 0} \frac{\left\|\sum_{i=0}^k \tilde{c}_i^\lambda \tilde{x}_i\right\|}{\|x_0 - x^*\|} \leq \frac{1}{\kappa} S_\kappa(k, 0).$$

Finally, the desired result is obtained by using Corollary 3.4.

## B.2 Proof of Proposition 5.1

*Proof.* First, we have to form the matrices  $\tilde{R}$ ,  $\mathcal{E}$  and  $P$ . We begin with  $\mathcal{E}$ , defined in (15). Indeed,

$$\begin{aligned} \mathcal{E}_i = x_i - \tilde{x}_i &\Rightarrow \mathcal{E}_0 = 0, \\ &\mathcal{E}_1 = \varepsilon_1, \\ &\mathcal{E}_2 = \varepsilon_2 + G\varepsilon_1, \\ &\mathcal{E}_k = \sum_{i=1}^k G^{k-i} \varepsilon_i. \end{aligned}$$

It means that each  $\|\mathcal{E}_i\| = O(\|\varepsilon_i\|)$ . By using (30),

$$\begin{aligned} \mathbb{E}\|\mathcal{E}\| &\leq \sum_i \mathbb{E}\|\mathcal{E}_i\| \\ &\leq \sum_i \mathbb{E}\|\mathcal{E}_i - \nu_i\| + \|\nu_i\| \\ &\leq O(\nu + \sigma) \end{aligned}$$

For  $\tilde{R}$ , we notice that

$$\begin{aligned} \tilde{R}_t &= \tilde{x}_{t+1} - \tilde{x}_t, \\ &= x_{t+1} - x_t + \mathcal{E}_{t+1} - \mathcal{E}_t, \\ &= R_t + \sum_{i=1}^{t+1} G^{t+1-i} \varepsilon_i - \sum_{i=1}^t G^{t-i} \varepsilon_i, \\ &= R_t + (G - \mathbf{I}) \sum_{i=1}^t G^{t-i} \varepsilon_i + \varepsilon_{t+1} \\ &\leq O(\|x_0 - x^*\|) + O(\sum_i \varepsilon_i). \end{aligned}$$

We get (25) by splitting the norm,

$$\mathbb{E}[\|\tilde{R}\|] \leq \|R\| + \sum_{i=1}^k \mathbb{E}[O(\|\varepsilon_i\|)] \leq O(\|x_0 - x^*\|) + O(\nu + \sigma).$$

Finally, by definition of  $P$ ,

$$\|P\| \leq 2\|\mathcal{E}\|\|R\| + \|\mathcal{E}\|^2.$$

Taking the expectation leads to the desired result,

$$\begin{aligned} \mathbb{E}[\|P\|] &\leq 2\mathbb{E}[\|\mathcal{E}\|\|R\|] + \mathbb{E}[\|\mathcal{E}\|^2], \\ &\leq 2\|R\| \mathbb{E}[\|\mathcal{E}\|] + \mathbb{E}[\|\mathcal{E}\|_F^2], \\ &\leq O(\|x_0 - x^*\|(\sigma + \nu)) + O((\sigma + \nu)^2). \end{aligned}$$

■

### B.3 Proof of Proposition 5.2

*Proof.* We start with (24), then we use (13)

$$\begin{aligned} & \left\| \sum_{i=0}^k c_i^\lambda x_i - x^* \right\| + O(\|x_0 - x^*\|) \mathbb{E}[\|\Delta c^\lambda\|] + \mathbb{E}[\|\tilde{c}^\lambda\| \|\mathcal{E}\|], \\ & \leq \left\| \sum_{i=0}^k c_i^\lambda x_i - x^* \right\| + O(\|x_0 - x^*\|) \frac{\|c_\lambda\|}{\lambda} \mathbb{E}[\|P\|] + \sqrt{\mathbb{E}[\|\tilde{c}_\lambda\|^2] \mathbb{E}[\|\mathcal{E}\|^2]}. \end{aligned}$$

The first term can be bounded by (19),

$$\left\| \sum_{i=0}^k c_i^\lambda x_i - x^* \right\| \leq \frac{1}{\kappa} \sqrt{S_\kappa(k, \bar{\lambda}) \|x_0 - x^*\|^2 - \lambda \|c^\lambda\|^2}.$$

We combine this bound with the second term by maximizing over  $\|c^\lambda\|$ . The optimal value is given in (31),

$$\left\| \sum_{i=0}^k c_i^\lambda x_i - x^* \right\| + O(\|x_0 - x^*\|) \frac{\|c_\lambda\|}{\lambda} \mathbb{E}[\|P\|] \leq \|x_0 - x^*\| S_\kappa(k, \bar{\lambda}) \sqrt{\frac{1}{\kappa^2} + \frac{O(\|x - x^*\|^2) \mathbb{E}[\|P\|^2]}{\lambda^3}},$$

where  $\bar{\lambda} = \lambda / \|x_0 - x^*\|^2$ . Since, by Proposition 5.1,

$$\mathbb{E}[\|P\|^2] \leq O\left((\nu + \sigma)^2 (\|x_0 - x^*\| + \nu + \sigma)^2\right),$$

we have

$$\begin{aligned} & \left\| \sum_{i=0}^k c_i^\lambda x_i - x^* \right\| + O(\|x_0 - x^*\|) \frac{\|c_\lambda\|}{\lambda} \mathbb{E}[\|P\|] \\ & \leq \|x_0 - x^*\| S_\kappa(k, \bar{\lambda}) \sqrt{\frac{1}{\kappa^2} + \frac{O(\|x - x^*\|^2 (\nu + \sigma)^2 (\|x_0 - x^*\| + \nu + \sigma)^2)}{\lambda^3}} \end{aligned} \quad (32)$$

The last term can be bounded using (16),

$$\begin{aligned} \sqrt{\mathbb{E}[\|c_\lambda\|^2] \mathbb{E}[\|\mathcal{E}\|^2]} & \leq O\left(\sqrt{\sum_{i=0}^k \|\mathcal{E}_i\|^2} \sqrt{\mathbb{E}[\|\tilde{c}_\lambda\|^2]}\right) \\ & \leq O\left((\nu + \sigma) \sqrt{\mathbb{E}[\|\tilde{c}_\lambda\|^2]}\right) \\ & \leq O\left((\nu + \sigma) \sqrt{\mathbb{E}\left[1 + \frac{\|\tilde{R}\|^2}{\lambda}\right]}\right) \\ & \leq O\left((\nu + \sigma) \sqrt{1 + \frac{\mathbb{E}[\|\tilde{R}\|_F^2]}{\lambda}}\right) \end{aligned}$$

However,

$$\begin{aligned} \mathbb{E}[\|\tilde{R}\|_F^2] & = \sum_{i=0}^k \mathbb{E}[\|\tilde{r}_i\|^2] \\ & = \sum_{i=0}^k \|r_i\|^2 + \mathbb{E}[r_i^T \mathcal{E}_i + \|\mathcal{E}_i\|^2] \\ & \leq O(\|x_0 - x^*\|^2 + (\nu + \sigma)\|x_0 - x^*\| + (\nu + \sigma)^2) \\ & \leq O(\|x_0 - x^*\| + (\nu + \sigma))^2 \end{aligned}$$

Finally,

$$\sqrt{\mathbb{E}[\|c_\lambda\|^2] \mathbb{E}[\|\mathcal{E}\|^2]} \leq O\left((\nu + \sigma) \sqrt{1 + \frac{(\|x_0 - x^*\| + (\nu + \sigma))^2}{\lambda}}\right) \quad (33)$$

We get (28) by summing (32) and (33), then by replace all  $\frac{\nu + \sigma}{\|x_0 - x^*\|}$  by  $\tau$  and  $\frac{\lambda}{\|x_0 - x^*\|^2}$  by  $\bar{\lambda}$ . ■

## C Additional numerical experiments

### C.1 Legend

|          |         |          |              |              |             |              |              |
|----------|---------|----------|--------------|--------------|-------------|--------------|--------------|
| --- SAGA | --- Sgd | --- SVRG | --- Katyusha | --- RNA+SAGA | --- RNA+Sgd | --- RNA+SVRG | --- RNA+Kat. |
|----------|---------|----------|--------------|--------------|-------------|--------------|--------------|

### C.2 datasets

|               | Sonar UCI (Son) | Madelon UCI (Mad) | Random (Ran) | Sido0 (Sid) |
|---------------|-----------------|-------------------|--------------|-------------|
| # samples $N$ | 208             | 2000              | 4000         | 12678       |
| Dimension $d$ | 60              | 500               | 1500         | 4932        |

Table 1: Datasets used in the experiments.

### C.3 Quadratic loss

#### C.3.1 Sonar dataset

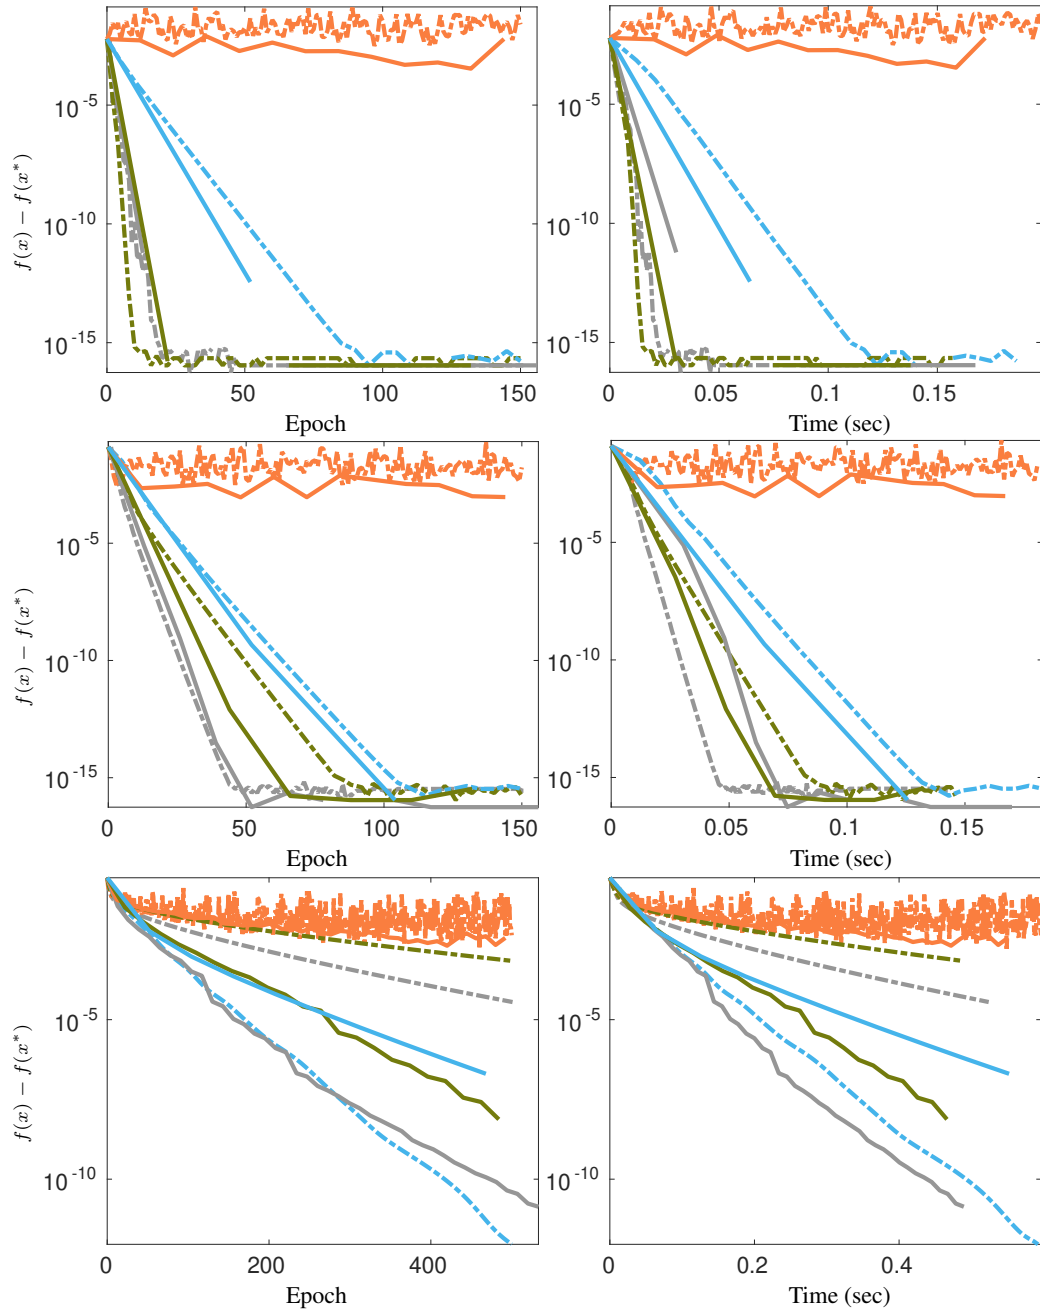

Figure 3: Quadratic loss with (top to bottom) good, moderate and bad conditioning using Son dataset.

### C.3.2 Madelon dataset

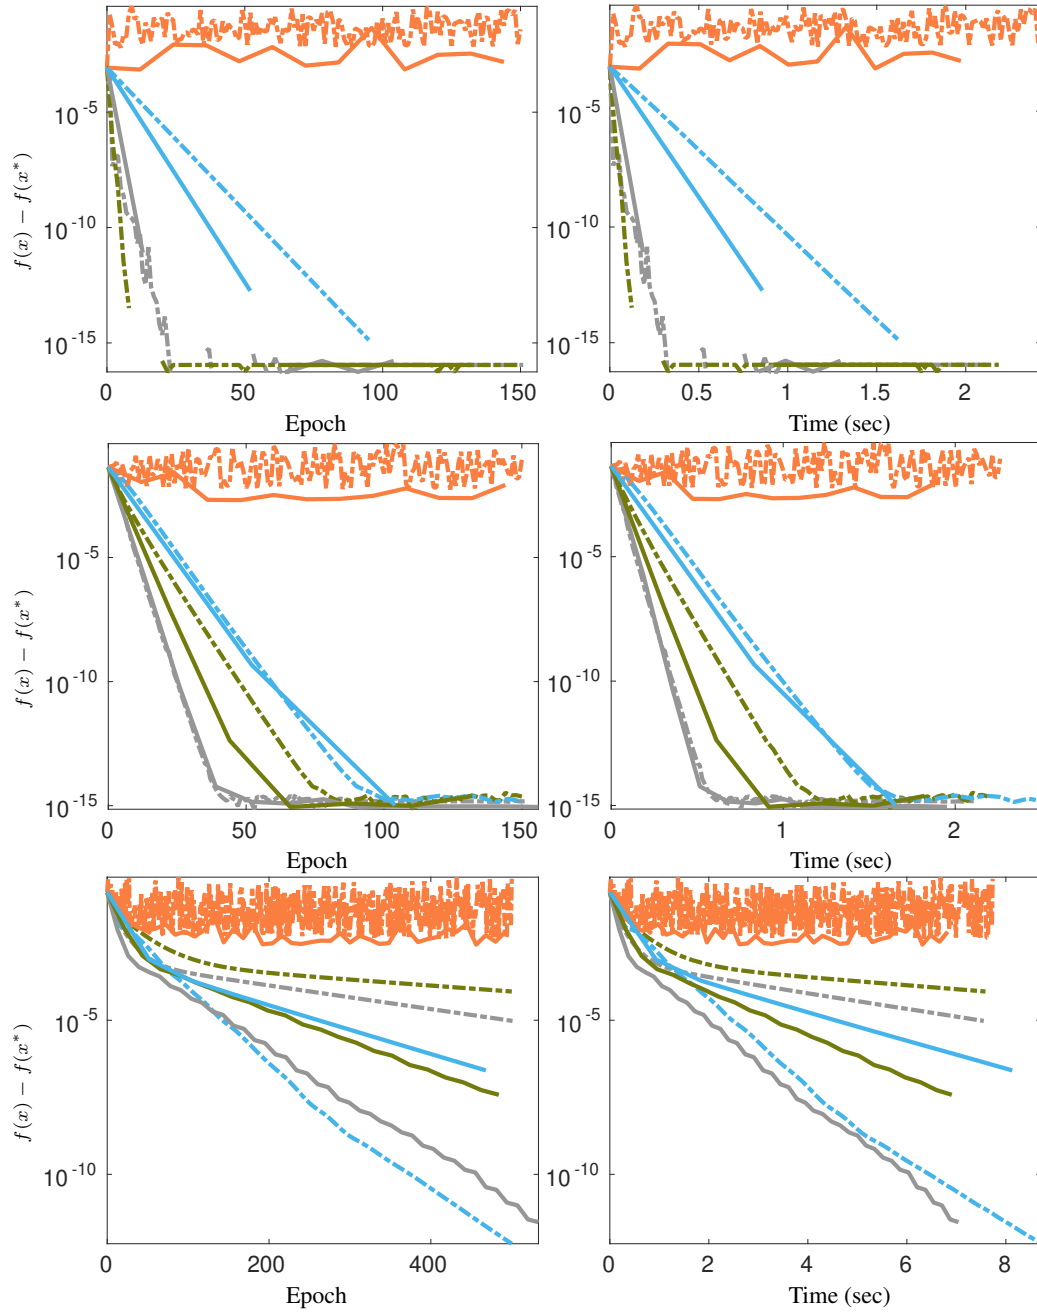

Figure 4: Quadratic loss with (top to bottom) good, moderate and bad conditioning using Mad dataset.

### C.3.3 Random dataset

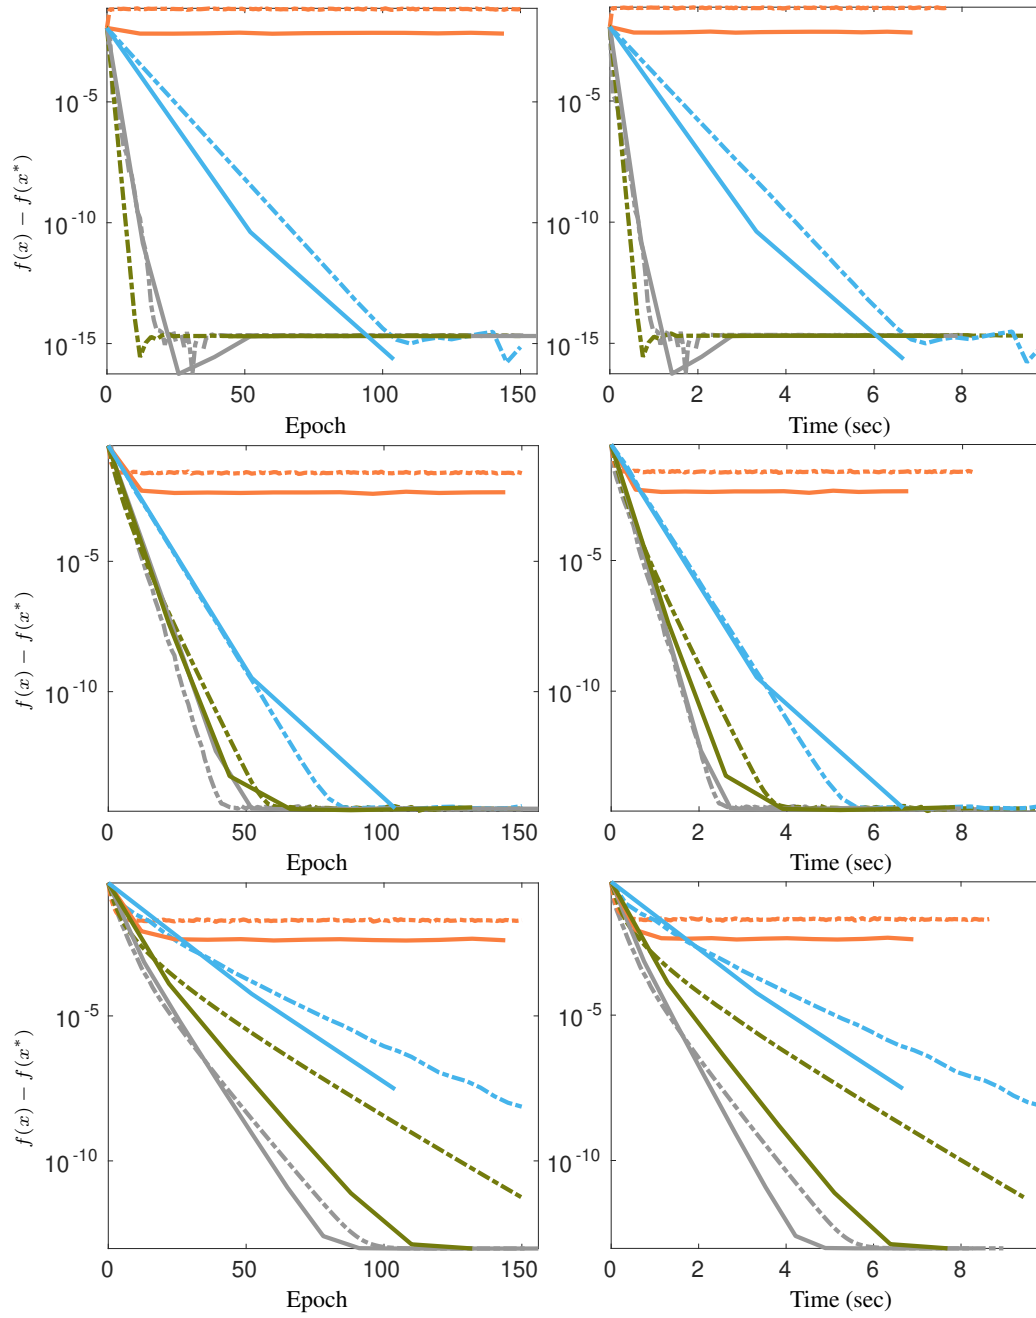

Figure 5: Quadratic loss with (top to bottom) good, moderate and bad conditioning using Ran dataset.

### C.3.4 Sido0 dataset

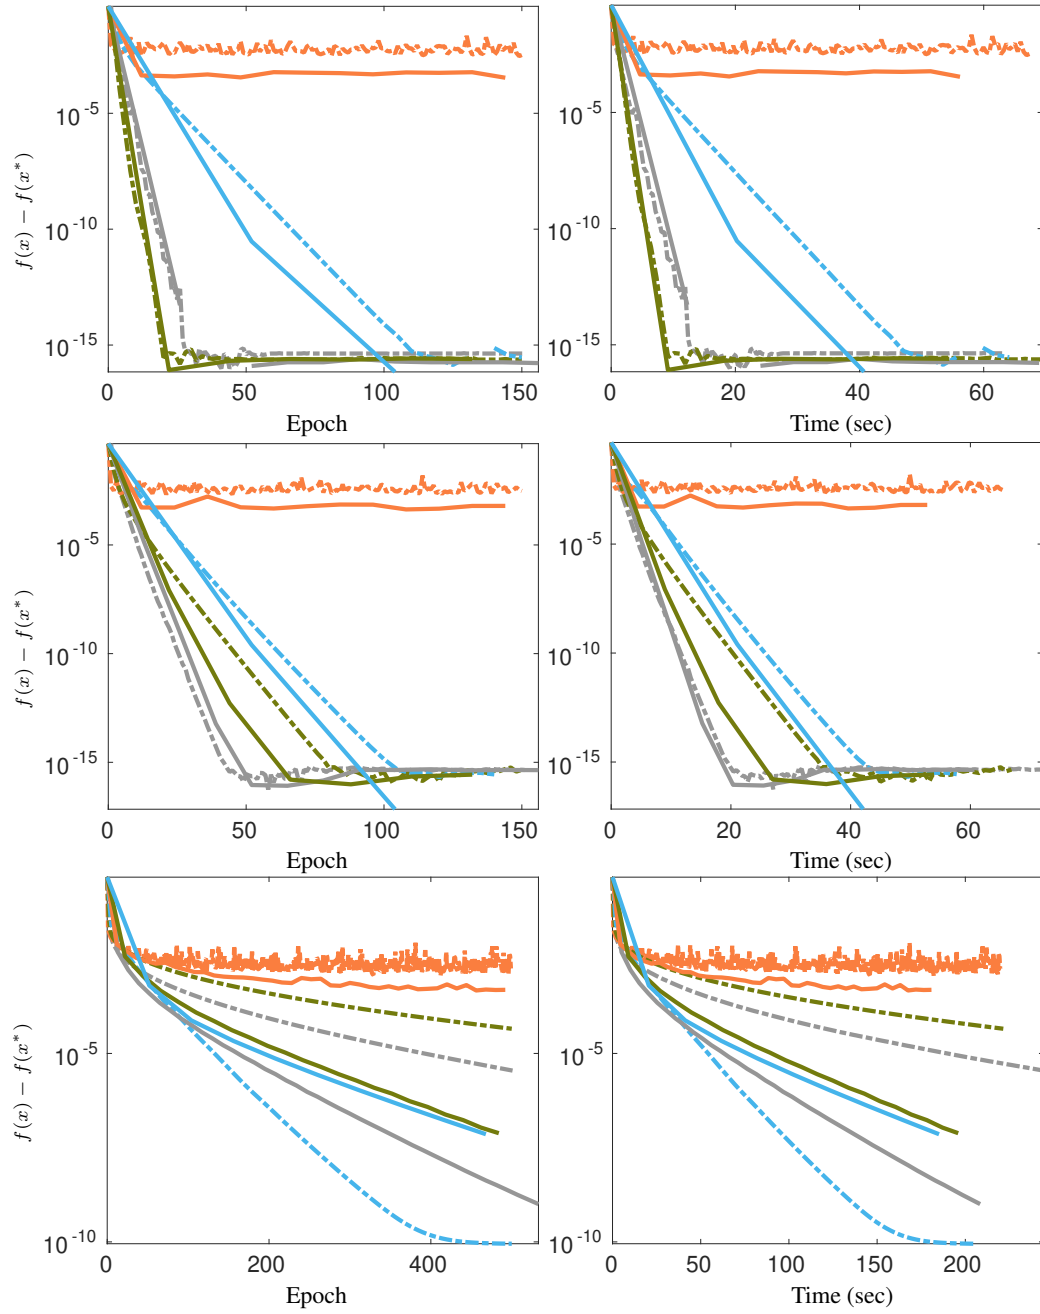

Figure 6: Quadratic loss with (top to bottom) good, moderate and bad conditioning using `Sid` dataset.



## C.4 Logistic loss

### C.4.1 Sonar dataset

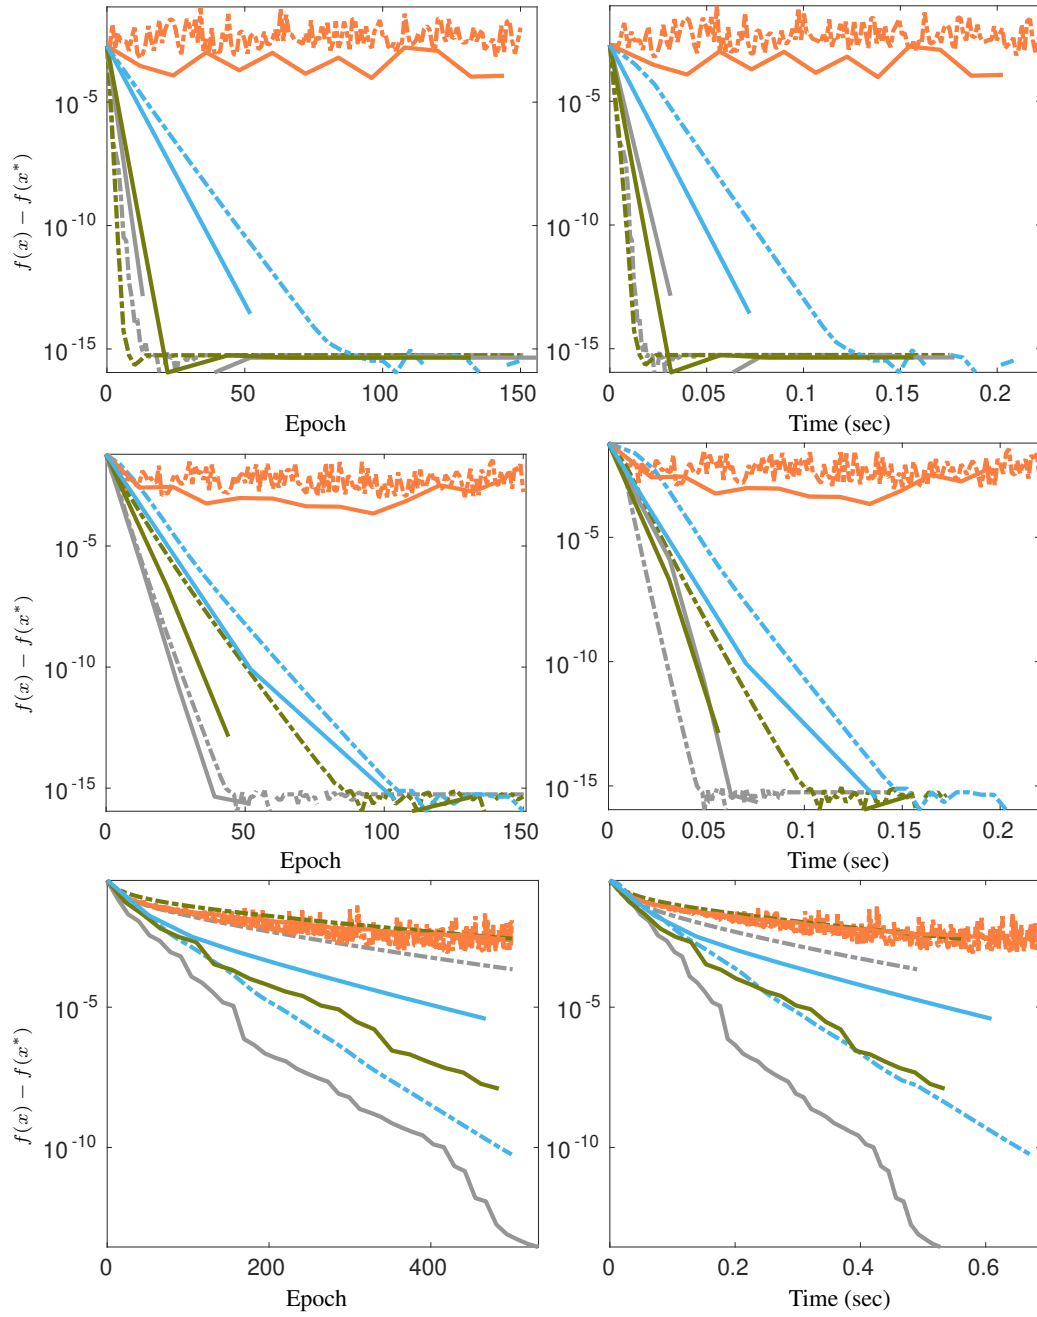

Figure 7: Logistic loss with (top to bottom) good, moderate and bad conditioning using Son dataset.

### C.4.2 Madelon dataset

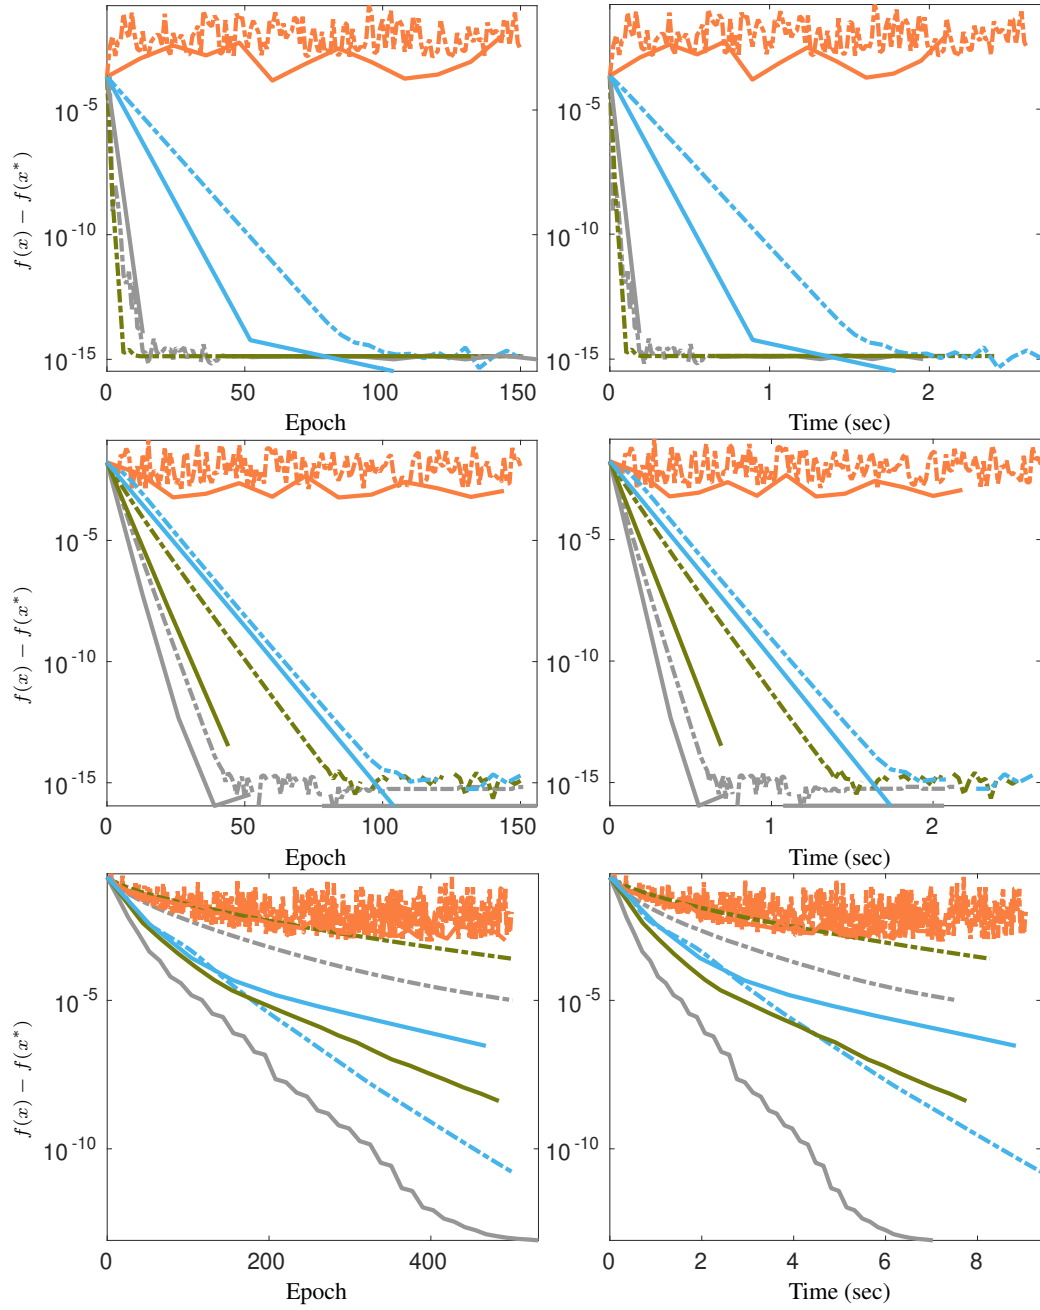

Figure 8: Logistic loss with (top to bottom) good, moderate and bad conditioning using Mad dataset.

### C.4.3 Random dataset

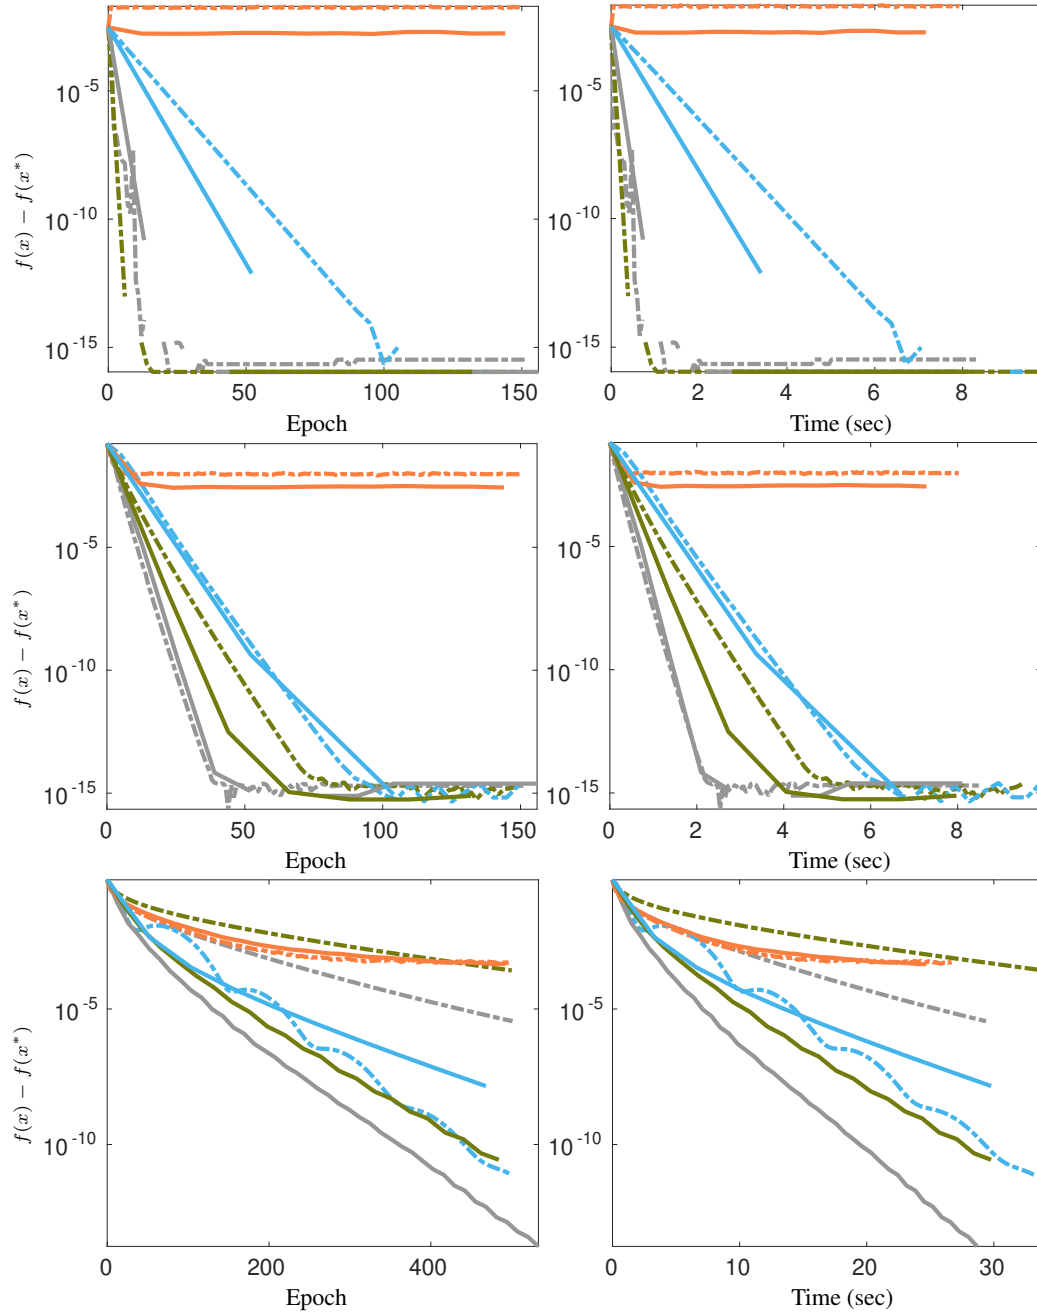

Figure 9: Logistic loss with (top to bottom) good, moderate and bad conditioning using Ran dataset.

#### C.4.4 Sido0 dataset

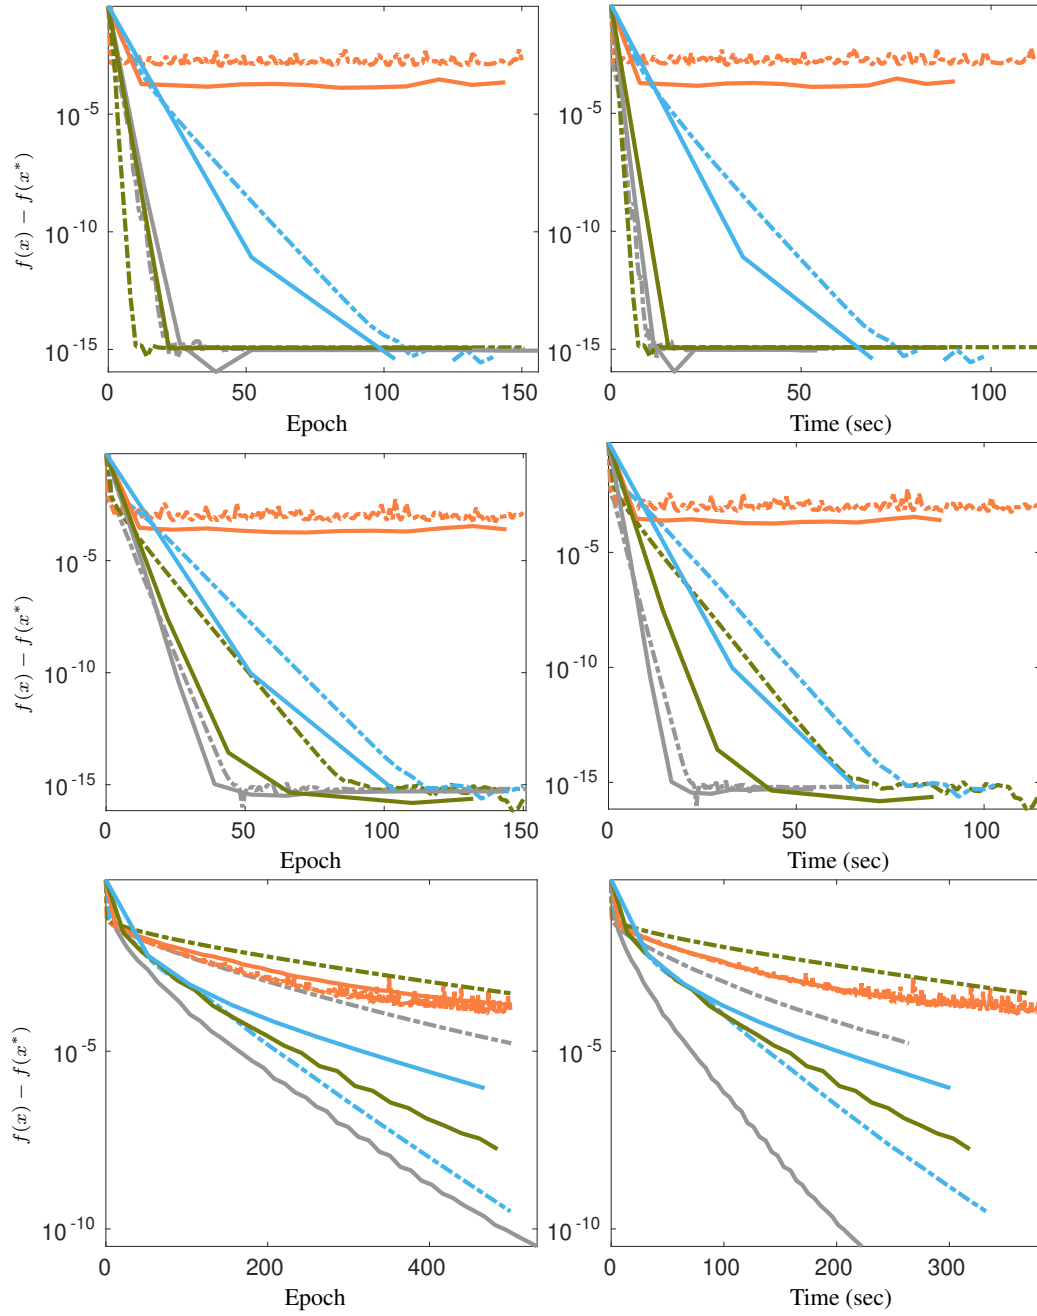

Figure 10: Logistic loss with (top to bottom) good, moderate and bad conditioning using `Sid` dataset.
